# Supplementary material
Source: PubMed Central journal article supplement (PMC7025720)
Supplement: NIHMS1067768-supplement-1.pdf [file NIHMS1067768-supplement-1.pdf]

## Supplementary Figures

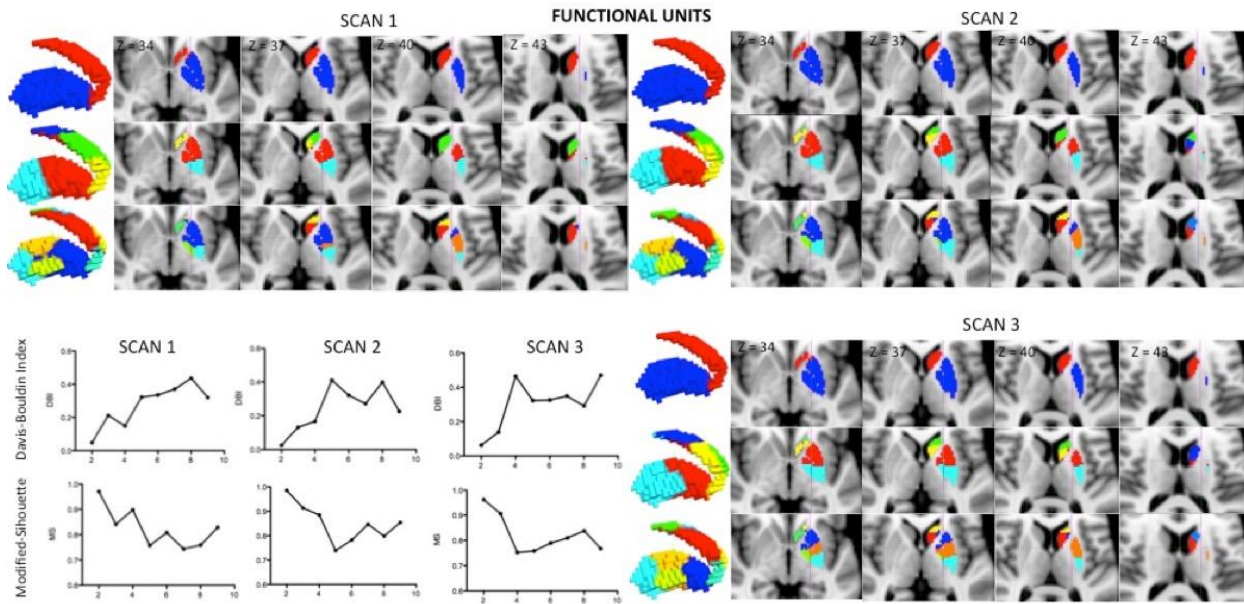

1128  
 1129  
 1130  
 1131  
 1132  
 1133  
 1134  
 1135  
 1136  
 1137  
 1138  
 1139  
 1140  
 1141  
 1142

**Figure 1.** Functional parcellation units for temporal resolution similarity measure. The group-level clustering of the BG in scans 1, 2 & 3 derive in very similar functional units. The 3D renders and sagittal views reveal a main partition of caudate and putamen at  $k=2$ , that remain in every resolution. While resolution  $k=5$  divides the caudate into 2 units of ventral and dorsal/anterior areas, the putamen is sectioned into anterior and posterior units. The  $k=9$  resolution shows a functional unit comprising nucleus accumbens and one for globus pallidum, while maintaining the tripartite caudate division of the  $k=5$  resolution and dividing putamen into anterior, central and posterior units. Moreover, the Davis-Bouldin Index, a measure of within-cluster dissimilarity, and the Modified-Silhouette Index, a measure of between-clusters dissimilarity, point to 2, 4 and 9 as best performing solutions for scan 1; 2, 7 and 9 for scan 2; and 2, 5 and 8 as the best performing solutions for scan 3.

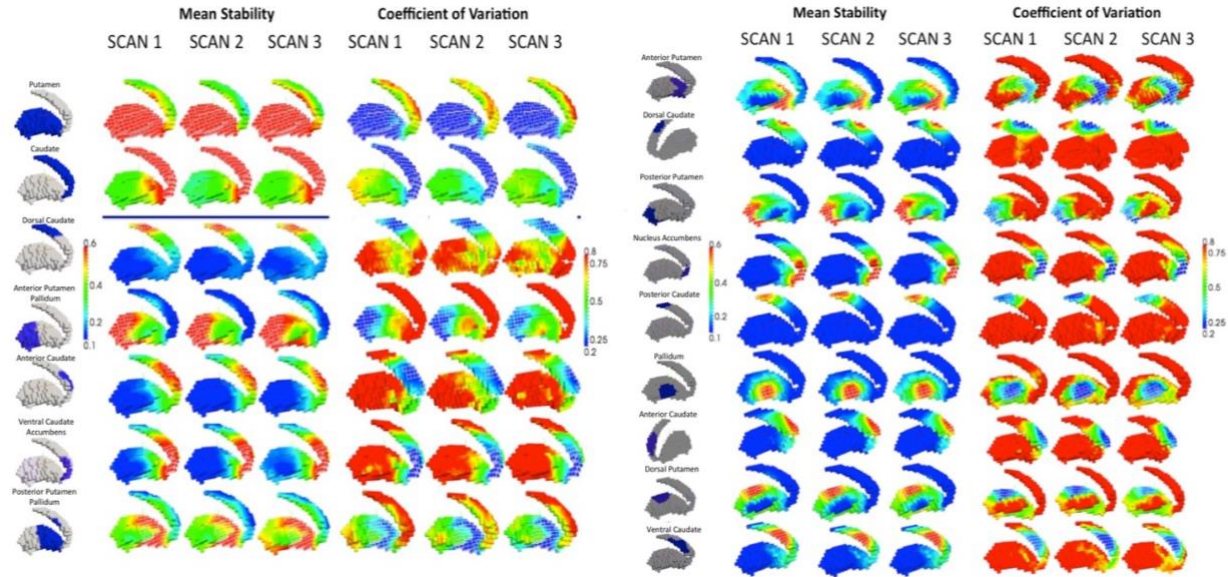

1143  
 1144 **Figure 2.** (A) Mean stability and coefficients of variation for k=2 and k=5 resolutions on maps obtained  
 1145 with temporal correlation as the similarity measure. The panels and renders show the average of the  
 1146 stability maps across subjects for the 2 and 5 target clusters (shown on the first column renders and  
 1147 delineated by a white wireframe on the 3D renders) of the k=2 and k=5 resolutions. All three scans show  
 1148 very similar mean stabilities, with highest values within the target cluster and lower values distant from it.  
 1149 The right columns show the coefficients of variation (standard deviation relative to mean) of the stability  
 1150 maps across subjects for the 2 and 5 target clusters in the k=2 and k=5 resolutions. Again, all three scans  
 1151 show very similar coefficients of variation, with lowest values within the target cluster and higher values  
 1152 for voxels distant from it. (B) Mean stability and coefficients of variation for resolution k=9.

## Reproducibility

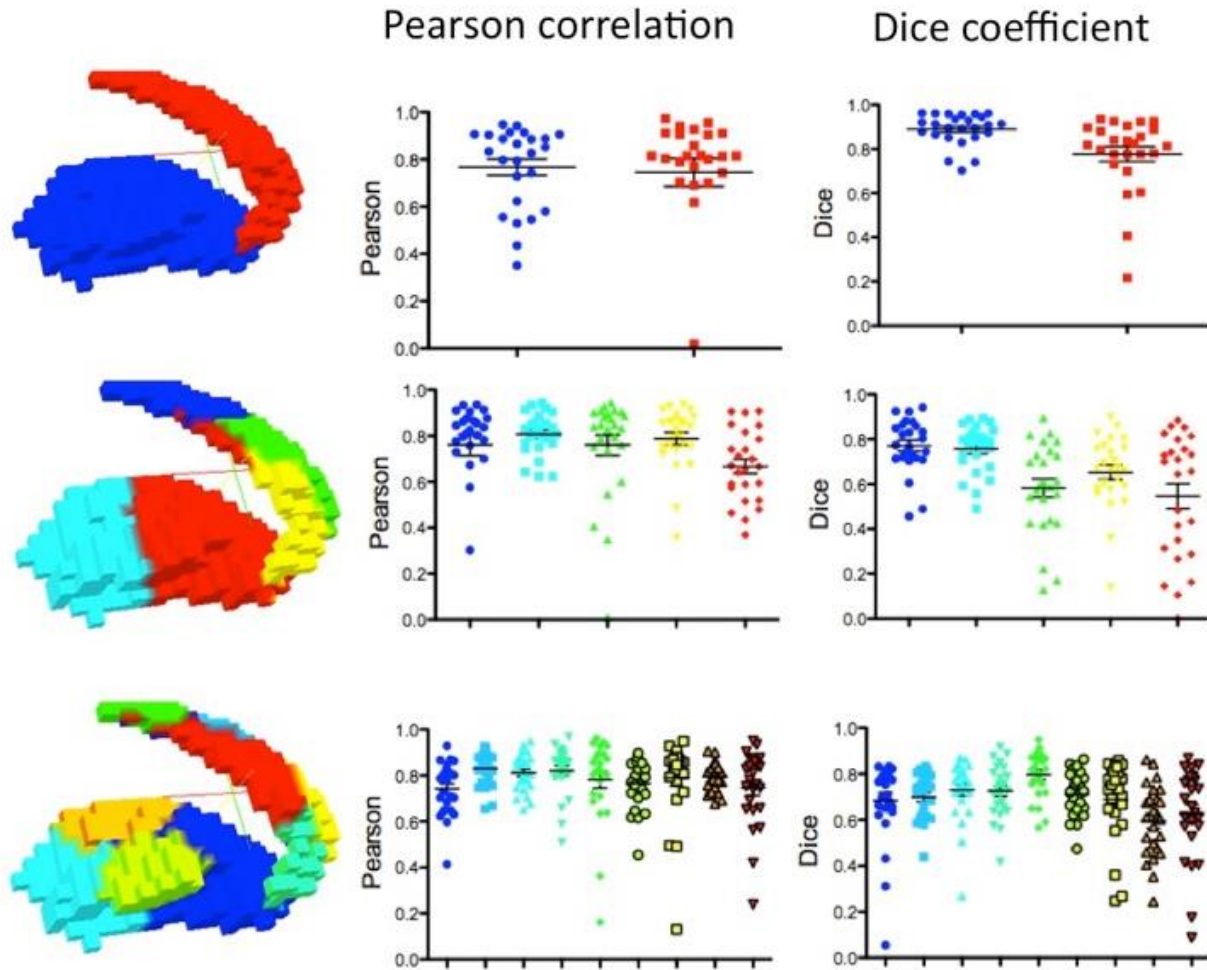

1153  
1154  
1155  
1156  
1157  
1158  
1159

**Figure 3.** Reproducibility of stability maps obtained by using the temporal correlation similarity measure. The 3D renders show the group-level functional units obtained for sessions 1 and 2. The plots indicate the reproducibility measured by Pearson correlation for each subject across stability maps obtained for resolutions  $k=2$ ,  $k=5$  and  $k=9$ . The Dice coefficient measured on binarized stability maps, in which 1 represents the most stable cluster, are also shown. These data reveal strong reproducibility of the stability maps obtained through BASC across different scans.

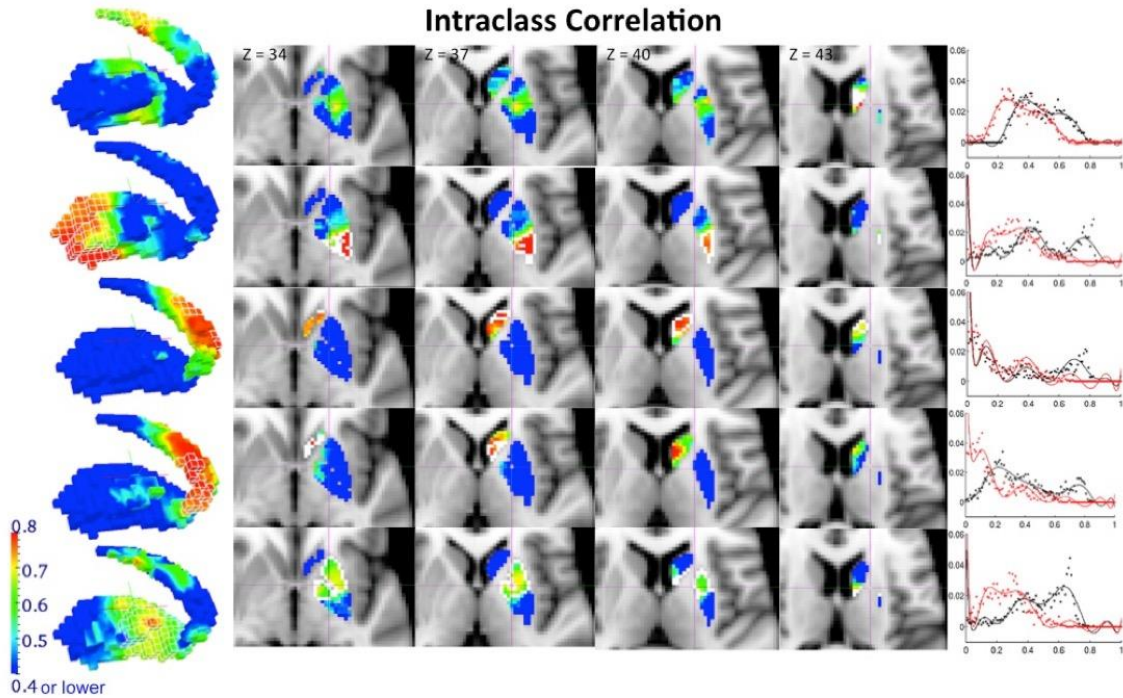

1160  
 1161  
 1162  
 1163  
 1164  
 1165  
 1166  
 1167  
 1168  
 1169  
 1170

**Figure 4.** Intra-class correlation (ICC) for maps obtained with temporal correlation as similarity measure with resolution  $k=5$ . We examined reliability at every voxel level through ICC in the stability maps, defined as the proportion of variability across subjects relative to the total variability in the data. ICC values for the stability maps obtained from scan 1 and the average of scans 2 and 3 at resolution  $k=5$  are delineated by a white line for the slice view and a white wireframe on the renders. High ICC values are only found in proximity to the target clusters. The low stability in voxels distant from the target cluster might explain this regional distribution of ICC values in the BG. The graph placed next to each cluster's ICC map represents the distribution of frequencies of the ICC values obtained when ICC was computed after having regressed out mean frame displacement for each subject (in black), and also when ICC was calculated without regressing that parameter out (in red).

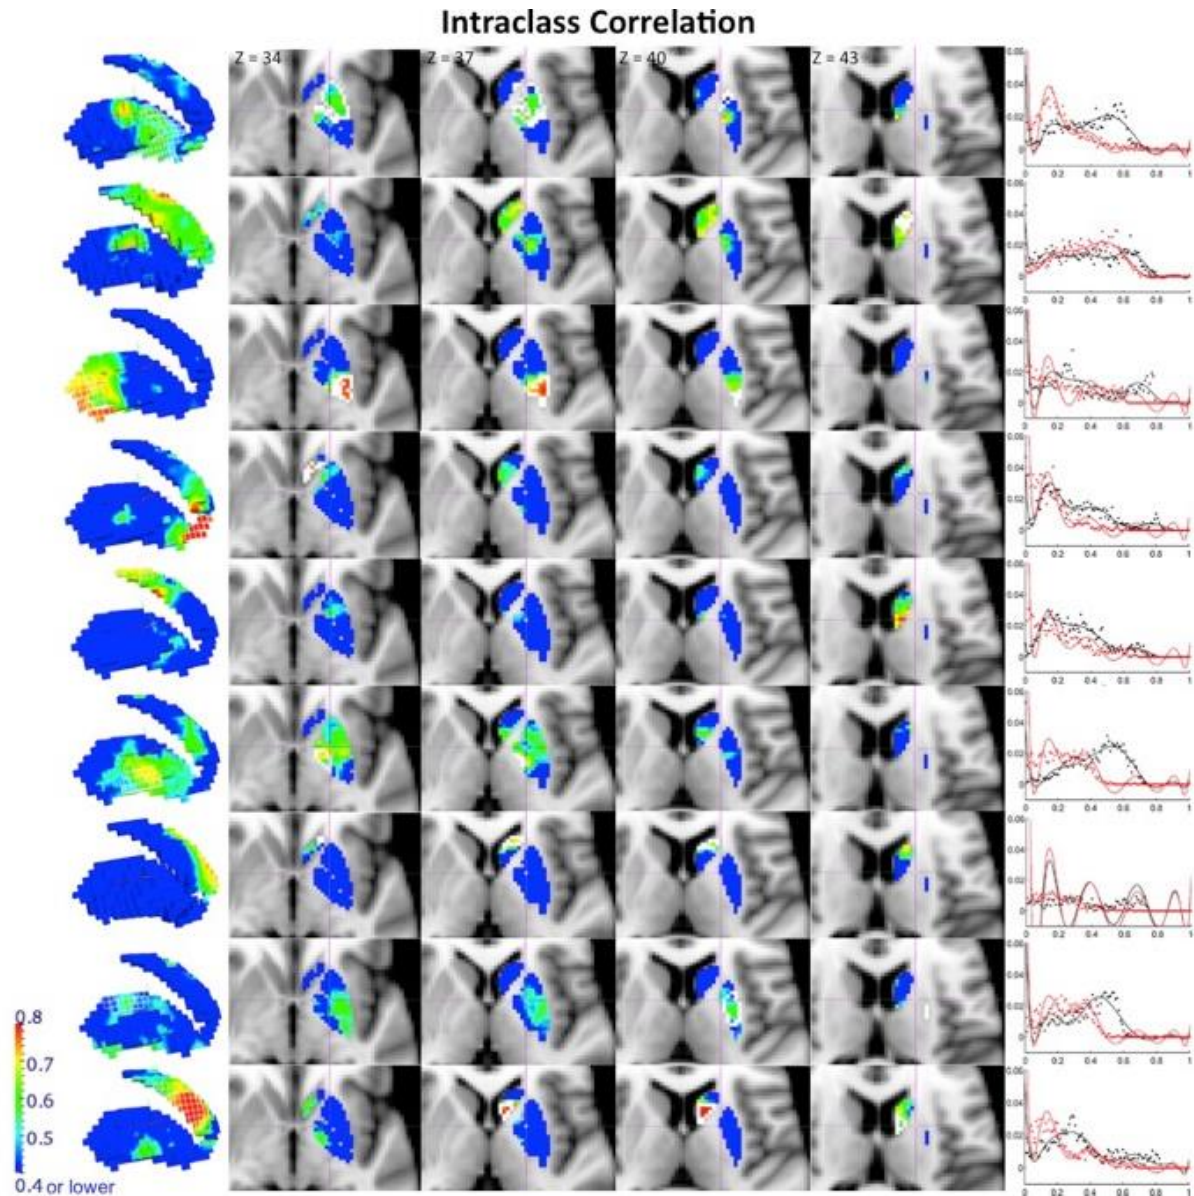

1171  
 1172 **Figure 5.** Intra-class correlation (ICC) for maps obtained with temporal correlation as the similarity  
 1173 measure with resolution  $k=9$ . We examined reliability at every voxel level through ICC in the stability  
 1174 maps, defined as the proportion of variability across subjects relative to the total variability in the data.  
 1175 ICC values between for the stability maps obtained from scan 1 and the average of scans 2 and 3 at  
 1176 resolution  $k=9$  are delineated by a white line for the slice view and a white wireframe on the renders.  
 1177 High ICC values are only found in proximity to the target cluster. The low stability in voxels distant from  
 1178 the target cluster might explain this regional distribution of ICC values in the BG. The graph placed next  
 1179 to each cluster's ICC map represents the distribution of frequencies of the ICC values obtained when ICC  
 1180 was computed after having regressed out mean frame displacement for each subject (in black), and also  
 1181 when ICC was calculated without regressing that parameter out (in red).

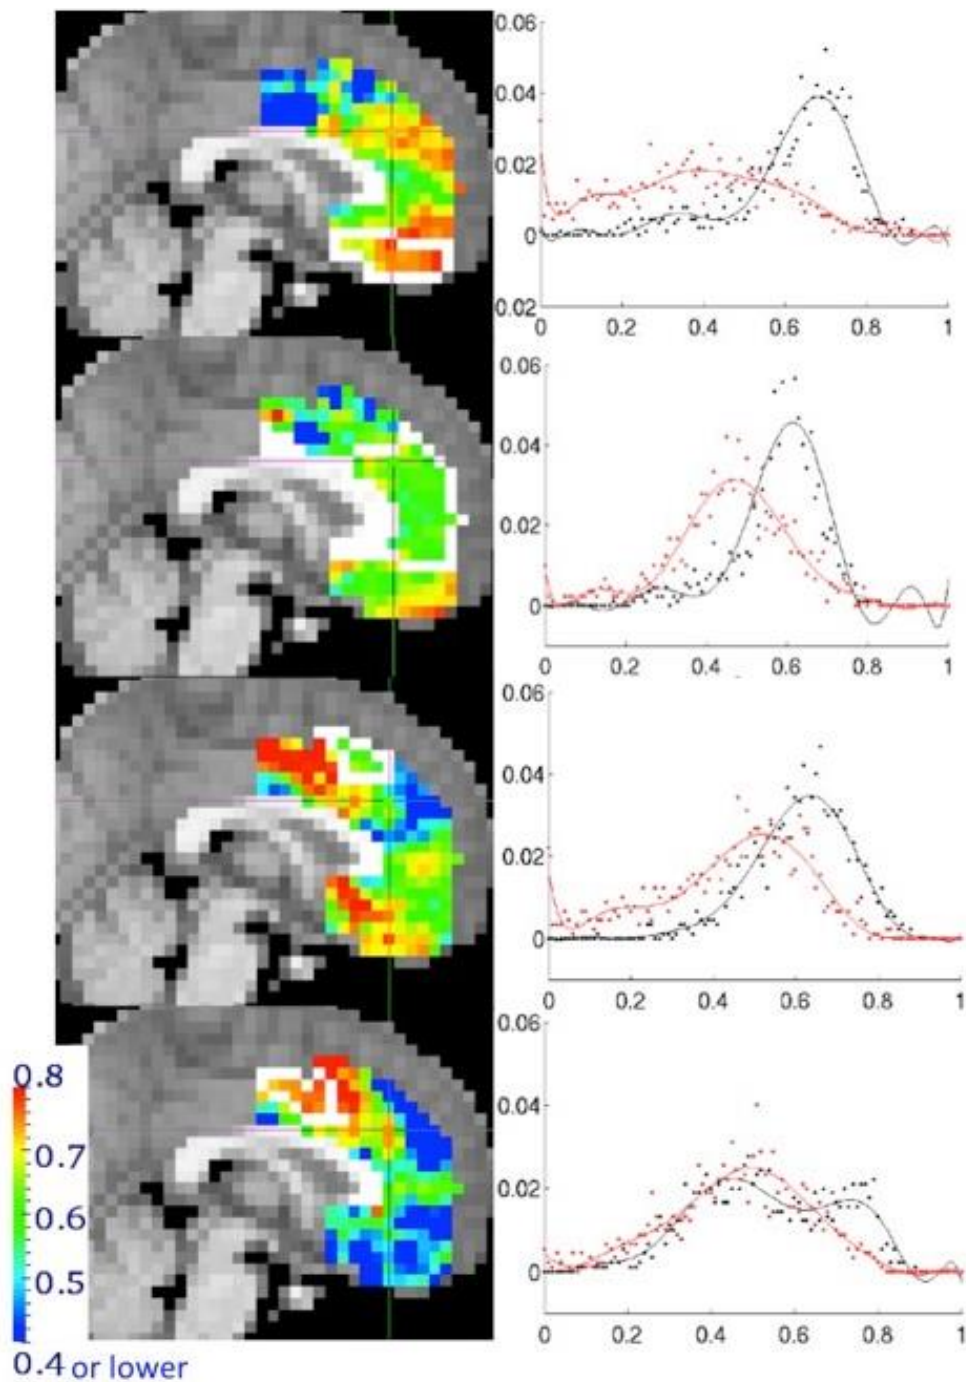

1182  
 1183 **Figure 6.** Intra-class correlation (ICC) for maps obtained by applying BASC on a different brain region.  
 1184 ICC values between sessions 1 and 2 in the TRT sample for the stability maps obtained from the medial  
 1185 wall (target clusters delineated by a white line). Again, high ICC values are only found in proximity to the  
 1186 target cluster. The low stability in voxels distant from the target cluster might explain the regional  
 1187 distribution of ICC values in the BG. The graph placed next to each cluster's ICC map represents the  
 1188 distribution of frequencies of the ICC values obtained when ICC was computed after having regressed out  
 1189 mean frame displacement for each subject (in black), and also when ICC was calculated without  
 1190 regressing that parameter out (in red).

1191

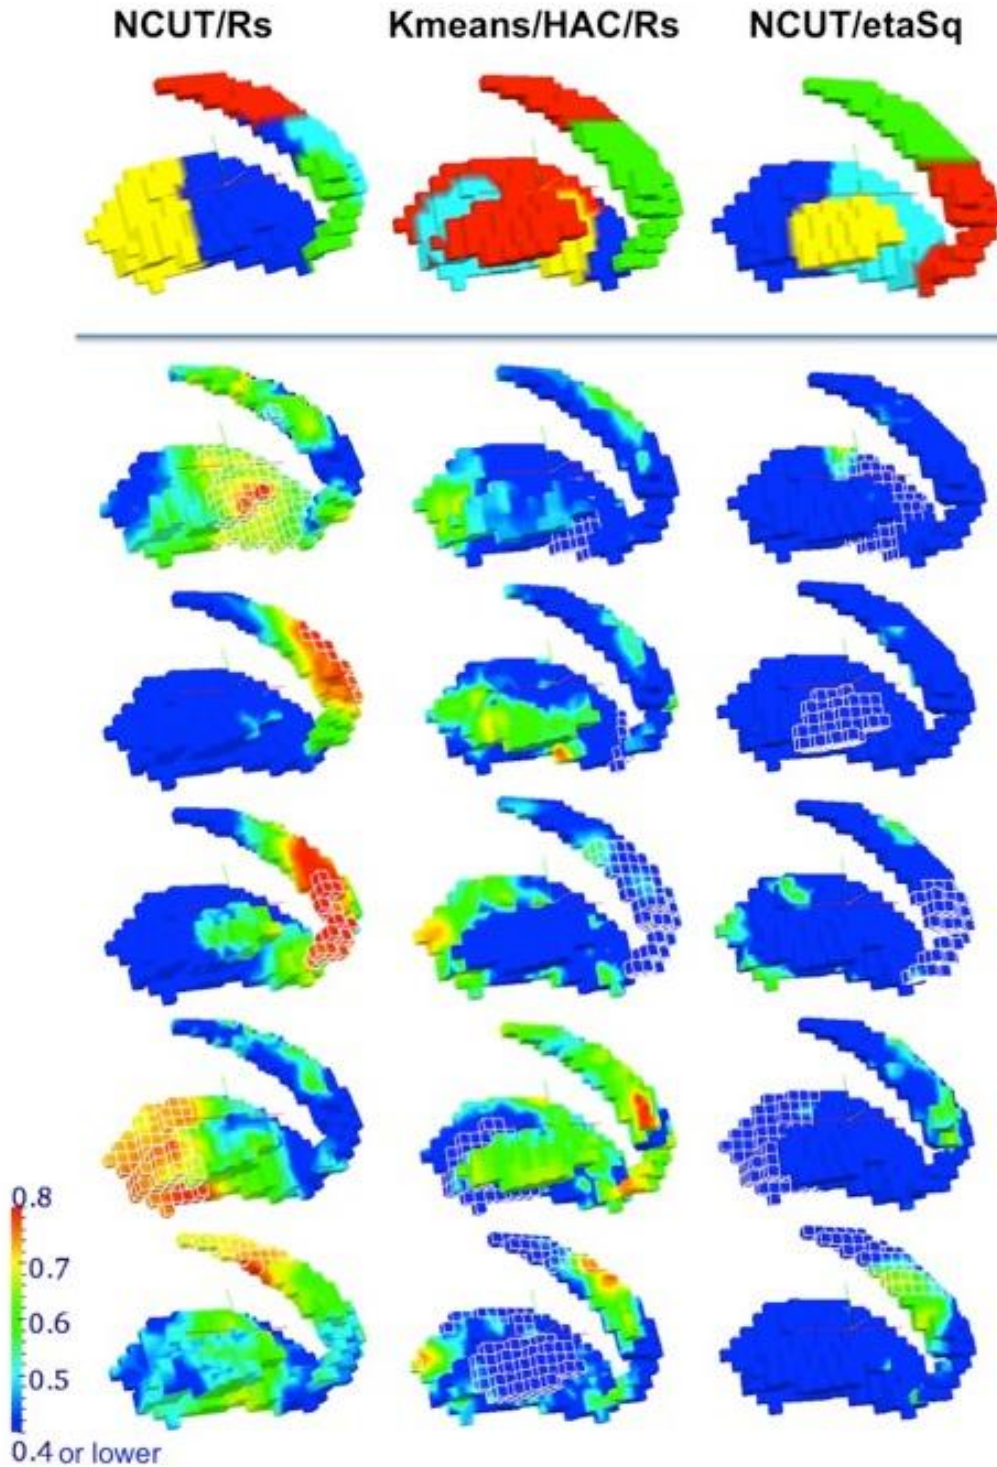

1192  
 1193 **Figure 7.** Group-level divisions and ICC maps for stability maps obtained using (1) NCUT clustering and  
 1194 spatial correlation as the similarity measure, (2) k-means clustering for the individual level analysis and  
 1195 hierarchical clustering (HAC) for the group-level one, and spatial correlation as the similarity measure,  
 1196 and finally (3) NCUT clustering and eta square as the similarity measure. K-means/HAC/Rs showed a  
 1197 very unfeasible parcellation of the BG and lower ICC values with an unspecific distribution, while  
 1198 NCUT/eta<sup>2</sup> displayed a feasible BG division, which differed from the one obtained by our method, with  
 1199 low reliability.

1200

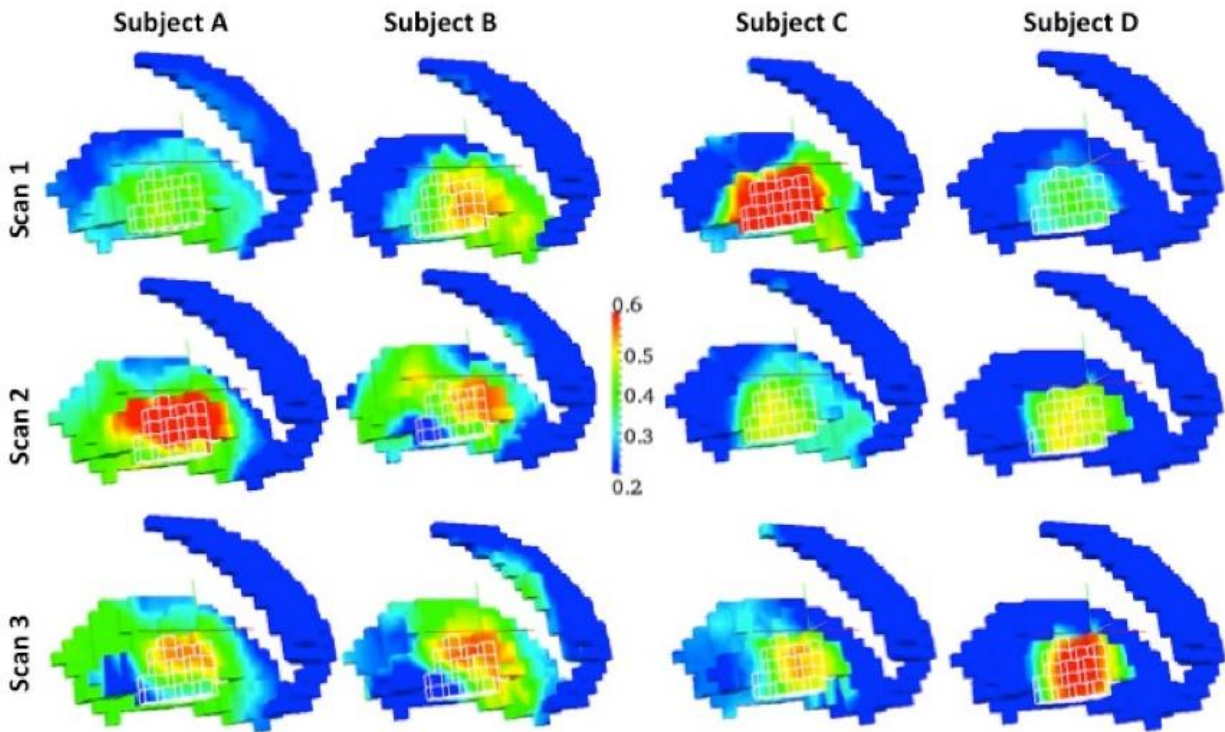

1201

1202

1203

1204

1205

1206

1207

1208

1209

1210

1211

1212

1213

1214

1215

1216

1217

1218

1219

**Figure 8.** Individual stability maps for four subjects across the three scans. Notice how for every subject and scan, the target unit, highlighted with a white wireframe, shows the highest stability values. It is interesting to notice that the most variability across subjects is found around the target unit's boundaries.
